# Supplementary material for: Glucosinolates, a natural chemical arsenal: More to tell than the myrosinase story
Source: PubMed Central journal article supplement (PMC10114928; doi:10.3389/fmicb.2023.1130208), 2023-04-05
Supplement: Table_1.pdf [file Table_1.pdf]

**Table 1.** Summary of the antimicrobial activity of glucosinolates and the hydrolysis byproducts including isothiocyanates, nitriles-derivatives among others, reported in the literature. Glucosinolates were classified herein as Groups I to V according to scheme I of this manuscript or indicated if mixtures were tested.

| Glucosinolate                                     | Hydrolysis Product                                                                                    | Hydrolysis Method                                 | Source                                                                 | Antimicrobial Activity                                        | Bacteria/Fungi                                                                                                                                                                                          | Reference                                                                                                                |
|---------------------------------------------------|-------------------------------------------------------------------------------------------------------|---------------------------------------------------|------------------------------------------------------------------------|---------------------------------------------------------------|---------------------------------------------------------------------------------------------------------------------------------------------------------------------------------------------------------|--------------------------------------------------------------------------------------------------------------------------|
| [Group I]                                         | Allyl isothiocyanate                                                                                  | Commercial and/or synthetic sources (high purity) | Sigma Chemicals                                                        | Antimicrobial (studied in vapor state)                        | <i>Salmonella typhimurium</i> , <i>Escherichia coli</i> O157:H7, <i>Listeria monocytogenes</i> , and fungi                                                                                              | Delaquis and Sholberg, 1997                                                                                              |
| [Group I]                                         | Allyl isothiocyanate + added to medium carrier: <i>Laminaria japonica</i> (brown seaweed)             | Commercial and/or synthetic sources (high purity) | Sigma-Aldrich                                                          | Antibacterial activity; bactericidal effect                   | <i>Clostridium perfringens</i> , <i>Campylobacter jejuni</i>                                                                                                                                            | El Fayoumy, 2021; Kim et al., 2008; Paes et al., 2011; Park and Pendleton, 2012; Dai and Lim, 2014; Siahaan et al., 2014 |
| [Group I]                                         | Allyl isothiocyanate                                                                                  | Commercial and/or synthetic sources (high purity) | Aldrich Chemical Co                                                    | Antibacterial; AITC effect was similar to that of polymyxin B | <i>Salmonella</i> Montevideo, <i>Escherichia coli</i> O157:H7, <i>Listeria monocytogenes</i>                                                                                                            | Lin et al., 2000b                                                                                                        |
| [Group I]                                         | Allyl isothiocyanate (dissolved in medium chain triglyceride); microencapsulated allyl isothiocyanate | Commercial and/or synthetic sources (high purity) | Sigma                                                                  | Antibacterial; tested on food                                 | <i>Escherichia coli</i> O157:H7, <i>Salmonella enterica</i> , <i>Vibrio parahaemolyticus</i> , <i>Staphylococcus aureus</i> , <i>Listeria monocytogenes</i>                                             | Liu and Yang, 2010; Chacon et al., 2006                                                                                  |
| [Group I]                                         | Allyl isothiocyanate (derived from the glucosinolate sinigrin)                                        | Commercial and/or synthetic sources (high purity) | Aldrich Chemical                                                       | Antibacterial                                                 | <i>Escherichia coli</i> O157:H7                                                                                                                                                                         | Luciano and Holley, 2009                                                                                                 |
| [Group I]                                         | Allyl isothiocyanate                                                                                  | Commercial and/or synthetic sources (high purity) | Sigma-Aldrich                                                          | Antibacterial                                                 | <i>Escherichia coli</i> (using heterotrophic plate count bacteria)                                                                                                                                      | Mushantaf et al., 2012                                                                                                   |
| [Group I]                                         | Allyl isothiocyanate (vapor phase) with modified atmosphere                                           | Commercial and/or synthetic sources (high purity) | Sigma-Aldrich Co.                                                      | Antibacterial                                                 | <i>Pseudomonas aeruginosa</i>                                                                                                                                                                           | Pang et al., 2013                                                                                                        |
| [Group I]<br>Sinigrin (tested but not hydrolysed) | Allyl isothiocyanate                                                                                  | Commercial and/or synthetic sources (high purity) | Sinigrin from Sigma/ allyl isothiocyanate, allyl cyanide from Aldrich/ | Antimicrobial                                                 | <i>Escherichia coli</i> , <i>Pseudomonas fluorescens</i> , <i>Aeromonas hydrophilia</i> , <i>Staphylococcus aureus</i> , <i>Bacillus subtilis</i> , <i>Pediococcus pentosaceus</i> , <i>Leuconostoc</i> | Shofran et al., 1998                                                                                                     |

|                                                                                                           |                                                                                                                                     |                                                                                                                                                                             |                                                                                                                                                                                                                                                                   |                                                                                                                                                |                                                                                                                                                                                                                                                                                                                                                                                                                  |                                       |
|-----------------------------------------------------------------------------------------------------------|-------------------------------------------------------------------------------------------------------------------------------------|-----------------------------------------------------------------------------------------------------------------------------------------------------------------------------|-------------------------------------------------------------------------------------------------------------------------------------------------------------------------------------------------------------------------------------------------------------------|------------------------------------------------------------------------------------------------------------------------------------------------|------------------------------------------------------------------------------------------------------------------------------------------------------------------------------------------------------------------------------------------------------------------------------------------------------------------------------------------------------------------------------------------------------------------|---------------------------------------|
|                                                                                                           |                                                                                                                                     |                                                                                                                                                                             | others were synthesized in lab                                                                                                                                                                                                                                    |                                                                                                                                                | <i>mesenteroides, Lactobacillus brevis and selected yeast</i>                                                                                                                                                                                                                                                                                                                                                    |                                       |
| <b>[Group I]</b><br>Glucosinolates from Japanese and Korean <i>Wasabia japonica</i>                       | Allyl isothiocyanate                                                                                                                | Enzymatic (endogenous) and commercial sources (high purity)                                                                                                                 | Japanese and Korean <i>Wasabia japonica</i> (extracts from roots, stems and leaves); allyl isothiocyanate levels determined and extracts tested for antibacterial activity in addition to testing allyl isothiocyanate standard (Wako Pure Chemical Industries)   | Antibacterial activity; leaf extracts showed strongest activity                                                                                | <i>Helicobacter pylori</i> and food-borne pathogenic bacteria ( <i>Escherichia coli</i> O157:H7, <i>Vibrio parahaemolyticus</i> , <i>Salmonella typhimurium</i> , <i>Staphylococcus aureus</i> , <i>Bacillus cereus</i> , <i>Streptococcus mutans</i> )                                                                                                                                                          | Shin et al., 2004                     |
| <b>[Group I]</b>                                                                                          | Major isothiocyanates released from horseradish root powder: allyl- and phenylethyl isothiocyanate; minor: 3-butenyl isothiocyanate | Enzymatic (endogenous). Horseradish powder mixed with water at 40°C for 2 h for maximum production of isothiocyanates                                                       | <i>Armoracia rusticana</i> (horseradish roots; Fluka Co.)                                                                                                                                                                                                         | Antimicrobial activity: stronger against fungi than facultative anaerobic bacteria, stronger against Gram-positive than Gram-negative bacteria | Oral microorganisms, facultative anaerobic bacteria: <i>Streptococcus mutans</i> , <i>Streptococcus sobrinus</i> , <i>Lactobacillus casei</i> , <i>Staphylococcus aureus</i> , <i>Enterococcus faecalis</i> , <i>Aggregatibacter actinomycetemcomitans</i> ; anaerobic bacteria: <i>Fusobacterium nucleatum</i> , <i>Prevotella nigrescens</i> , <i>Clostridium perfringens</i> ; yeast: <i>Candida albicans</i> | Park et al., 2013                     |
| <b>[Group I]</b>                                                                                          | Allyl-, benzyl- (most active), 2-phenylethyl isothiocyanate                                                                         | Not specified: AITC, BITC, and 2-PEITC (95%, 98% and 99% of purity, respectively) purified from cruciferous plants                                                          | Purified isothiocyanates from Cruciferous plant (not specified)                                                                                                                                                                                                   | Antibacterial                                                                                                                                  | Methicillin-resistant <i>Staphylococcus aureus</i> (MRSA)                                                                                                                                                                                                                                                                                                                                                        | Dias et al., 2014                     |
| <b>[Group I]</b><br>Sinigrin (different glucosinolates tested, antibacterial activity with only sinigrin) | Not determined                                                                                                                      | Pure purchased samples/ thermal degradation ; freeze dried broccoli powder extracted with boiling methanol (70%) for 10 min) for glucosinolate identification from Broccoli | Glucosinolates identified from <i>Brassica oleracea</i> (Broccoli); antimicrobial activity tested on pure glucosinolate standards (glucoiberin, sinigrin, glucotropaeolin glucobrassicin, phenethyl glucosinolate, and neoglucobrassicin) from ChromaDex (U.S.A.) | Antibacterial                                                                                                                                  | <i>Bacillus cereus</i> , <i>E. coli</i> , <i>Salmonella typhimurium</i> , methicilin resistant <i>S. aureus</i>                                                                                                                                                                                                                                                                                                  | Hinds et al., 2017                    |
| <b>[Groups I &amp; II]</b>                                                                                | Mustard flour (purchased, local company in Baltimore; contains allyl                                                                | Commercial and/or synthetic sources (high purity); Mustard flour                                                                                                            | Aldrich Chemical Co                                                                                                                                                                                                                                               | Antibacterial, bactericidal                                                                                                                    | Foodborne pathogens: rifampicin-resistant strain of <i>Salmonella</i> Montevideo, streptomycin-resistant                                                                                                                                                                                                                                                                                                         | Lin et al., 2000a; Park et al., 2000; |

|                                                                                                                                                                                                            |                                                                                                                                                                                                   |                                                                                                                                                                                                                   |                                                                                                                                                            |                                                                                                                                                                            |                                                                                                                                                                                                                                                                                                                |                                               |
|------------------------------------------------------------------------------------------------------------------------------------------------------------------------------------------------------------|---------------------------------------------------------------------------------------------------------------------------------------------------------------------------------------------------|-------------------------------------------------------------------------------------------------------------------------------------------------------------------------------------------------------------------|------------------------------------------------------------------------------------------------------------------------------------------------------------|----------------------------------------------------------------------------------------------------------------------------------------------------------------------------|----------------------------------------------------------------------------------------------------------------------------------------------------------------------------------------------------------------------------------------------------------------------------------------------------------------|-----------------------------------------------|
|                                                                                                                                                                                                            | isothiocyanate); allyl and methyl isothiocyanate                                                                                                                                                  |                                                                                                                                                                                                                   |                                                                                                                                                            |                                                                                                                                                                            | strains of <i>Escherichia coli</i> O157:H7 and <i>Listeria monocytogenes</i> ; <i>Salmonella enterica</i> serovar Typhimurium                                                                                                                                                                                  | Rhee et al., 2003                             |
| <b>[Groups I &amp; IV]</b><br>Sinigrin (2-propenyl glucosinolate), glucotropaeolin, gluconasturtiin                                                                                                        | Isothiocyanates: allyl-, benzyl-, 2-phenylethyl-; nitriles/cyanides: allyl-, benzyl-, 2-phenylethyl-, indole-3-acetonitrile; amines: allyl-, benzyl-, 2-phenylethyl-amines, and indole-3-carbinol | Commercial and/or synthetic sources (high purity)                                                                                                                                                                 | Purchased from Sigma-Aldrich, LKT Labs; glucotropaeolin and gluconasturtiin were a gift from Prof. Dr Renato Iori (CRA-ISCI, Italy), enzymatic degradation | Antibacterial: benzyl isothiocyanate and sulforaphane exhibited the strongest activity against Gram-positive and Gram-negative bacteria                                    | Indole-3-carbinol and Indole-3-acetonitrile had some activity against Gram-positive and Gram-negative bacteria, respectively. Glucosinolate hydrolysis products showed activity against plant pathogenic bacteria (role as phytochemicals).<br>Glucosinolates, Nitriles, and amines tested showed no activity. | Aires et al., 2009a;<br>Aires et al., 2009b   |
| <b>[Groups I &amp; IV]</b>                                                                                                                                                                                 | Allyl-, 2-phenylethyl isothiocyanate                                                                                                                                                              | Commercial and/or synthetic sources (high purity)                                                                                                                                                                 | Sigma-Aldrich                                                                                                                                              | Antibacterial; prevent/control biofilm formation and bacterial motility                                                                                                    | <i>Escherichia coli</i> , <i>Pseudomonas aeruginosa</i> , <i>Staphylococcus aureus</i> , <i>Listeria monocytogenes</i>                                                                                                                                                                                         | Borges et al., 2014a;<br>Borges et al., 2014b |
| <b>[Groups I &amp; IV]</b>                                                                                                                                                                                 | Allyl-, 2-phenylethyl isothiocyanate                                                                                                                                                              | Commercial and/or synthetic sources (high purity)                                                                                                                                                                 | Sigma-Aldrich                                                                                                                                              | Antibacterial                                                                                                                                                              | <i>Escherichia coli</i> , <i>Pseudomonas aeruginosa</i> , <i>Staphylococcus aureus</i> , <i>Listeria monocytogenes</i>                                                                                                                                                                                         | Borges et al., 2015                           |
| <b>[Groups I &amp; IV]</b>                                                                                                                                                                                 | Allyl-, benzyl-, 2-phenylethyl isothiocyanate                                                                                                                                                     | Commercial and/or synthetic sources (high purity)                                                                                                                                                                 | Sigma-Aldrich                                                                                                                                              | Antibacterial; synergy with some antibiotics                                                                                                                               | <i>Escherichia coli</i> , <i>Pseudomonas aeruginosa</i> , <i>Staphylococcus aureus</i> , <i>Listeria monocytogenes</i>                                                                                                                                                                                         | Saavedra et al., 2012;<br>Abreu et al., 2013  |
| <b>[Groups I &amp; IV]</b><br>Sinigrin and gluconasturtiin (2-phenylethyl glucosinolate); horseradish root powder was treated with $\beta$ -thioglucoside glucohydrolase enzyme to release isothiocyanates | Allyl- (60%), phenylethyl- (36%), 3-butenyl isothiocyanate (1.5%)                                                                                                                                 | Enzymatic (exogenous)                                                                                                                                                                                             | <i>Armoracia rusticana</i> (horseradish) root                                                                                                              | Antifungal                                                                                                                                                                 | Pathogenic dermal fungi: <i>Trichophyton rubrum</i> , <i>Trichophyton mentagrophytes</i> , <i>Microsporum canis</i> , <i>Epidermophyton floccosum</i>                                                                                                                                                          | Choi et al., 2017                             |
| <b>[Groups I &amp; IV]</b>                                                                                                                                                                                 | Allyl-, 2-phenyl isothiocyanate                                                                                                                                                                   | Thermal degradation. Horseradish distillates [distillate contained 90% allyl isothiocyanate and 9% of 2-phenethyl isothiocyanate; trace amounts of allyl thiocyanate]; thermal degradation (20 min after boiling) | Horseradish ( <i>Armoracia rusticana</i> ) root                                                                                                            | Antibacterial; horseradish distillates exerted variable bacteriostatic and bactericidal effects towards different bacterial strains on agar and cooked roast beef surfaces | <i>Staphylococcus aureus</i> , <i>Escherichia coli</i> O157:H7, <i>Salmonella typhimurium</i> , <i>Listeria monocytogenes</i> , <i>Serratia grimesii</i> , <i>Lactobacillus sake</i>                                                                                                                           | Ward et al., 1998                             |
| <b>[Groups I &amp; IV]</b>                                                                                                                                                                                 | Allyl-, benzyl- (most active), 2-phenylethyl isothiocyanate                                                                                                                                       | Not specified: AITC, BITC, and 2-PEITC (95%, 98% and 99% of                                                                                                                                                       | Purified isothiocyanates from Cruciferous plant (not specified)                                                                                            | Antibacterial                                                                                                                                                              | Methicillin-resistant <i>Staphylococcus aureus</i>                                                                                                                                                                                                                                                             | Dias et al., 2014                             |

|                                                                                                                                          |                                                                                                                                                                                                                                                                         |                                                                                                                                                                                                                                                                                                                                      |                                                                                                                                                                                                           |                                                                                                                          |                                                                                                                                                                                                                                                                                                                                                                           |                       |
|------------------------------------------------------------------------------------------------------------------------------------------|-------------------------------------------------------------------------------------------------------------------------------------------------------------------------------------------------------------------------------------------------------------------------|--------------------------------------------------------------------------------------------------------------------------------------------------------------------------------------------------------------------------------------------------------------------------------------------------------------------------------------|-----------------------------------------------------------------------------------------------------------------------------------------------------------------------------------------------------------|--------------------------------------------------------------------------------------------------------------------------|---------------------------------------------------------------------------------------------------------------------------------------------------------------------------------------------------------------------------------------------------------------------------------------------------------------------------------------------------------------------------|-----------------------|
|                                                                                                                                          |                                                                                                                                                                                                                                                                         | purity, respectively) were purified from cruciferous plants                                                                                                                                                                                                                                                                          |                                                                                                                                                                                                           |                                                                                                                          |                                                                                                                                                                                                                                                                                                                                                                           |                       |
| <b>[Groups I &amp; IV]</b>                                                                                                               | Allyl-, benzyl isothiocyanate                                                                                                                                                                                                                                           | Commercial and/or synthetic sources (high purity)                                                                                                                                                                                                                                                                                    | Sigma-Aldrich                                                                                                                                                                                             | Antibacterial (bactericidal rather than bacteriostatic)                                                                  | <i>Campylobacter jejuni</i>                                                                                                                                                                                                                                                                                                                                               | Dufour et al., 2012   |
| <b>[Groups I &amp; IV]</b>                                                                                                               | Allyl-, benzyl-, phenylethyl isothiocyanate; nature-identical isothiocyanate mixture                                                                                                                                                                                    | Commercial and/or synthetic sources (high purity). The phytomedical preparation Angocin® is made of 38% (v/v) AITC, 50% BITC, and 12% PEITC to correspond to horseradish and nasturtium glucosinolates/byproducts                                                                                                                    | Sigma-Aldrich; "nature-identical isothiocyanate mixture" Angocin® purchased to mimic isothiocyanates derived from nasturtium ( <i>Tropaeolum majoris</i> ) and horseradish ( <i>Armoracia rusticana</i> ) | Antibacterial; inhibit biofilm formation; combining with meropenem increased antibacterial activity                      | Gram-negative bacteria such as <i>Pseudomonas aeruginosa</i>                                                                                                                                                                                                                                                                                                              | Kaiser et al., 2017   |
| <b>[Groups I, II &amp; III]</b><br>Sinigrin, progoitrin, glucoiberin, 4-oxopentyl glucosinolate, glucocheirolin and glucoerysolin tested | Different glucosinolate hydrolysis products obtained through natural autolysis or exogenous myrosinase hydrolysis such as cheirolin (from glucocheirolin) and iberin (from glucoiberin). Allyl isothiocyanate (from sinigrin) was detected only after natural autolysis | Enzymatic (endogenous and exogenous)                                                                                                                                                                                                                                                                                                 | <i>Erysimum cornithium</i> Boiss (Brassicaceae)                                                                                                                                                           | Antimicrobial: glucocheirolin from seeds showed stronger antimicrobial activity than glucosinolates from leaves or roots | <i>Escherichia coli</i> , <i>Bacillus subtilis</i> , <i>Staphylococcus aureus</i> , <i>Streptococcus faecalis</i> , <i>Neisseria gonorrhoea</i> , <i>Pseudomonas aeruginosa</i> , <i>Candida albicans</i>                                                                                                                                                                 | Al-Gendy et al., 2010 |
| <b>[Groups I, II &amp; IV]</b>                                                                                                           | Methyl-, allyl-, benzyl isothiocyanates                                                                                                                                                                                                                                 | Commercial and/or synthetic sources (high purity)                                                                                                                                                                                                                                                                                    | Sigma-Aldrich Chemical Co.                                                                                                                                                                                | Antifungal (fungitoxic)                                                                                                  | <i>S. sclerotiorum</i> ; methyl, allyl and benzyl isothiocyanate were the most fungitoxic against <i>S. sclerotiorum</i> . Aromatic isothiocyanates (phenyl, benzyl and 2-phenylethyl isothiocyanates) less toxic in petri dishes (volatile form) but more toxic when dissolved in the agar than alkenyl aliphatic forms (methyl, allyl, butyl and ethyl isothiocyanates) | Kurt et al., 2011     |
| <b>[Groups I, II &amp; IV]</b><br>Sinigrin (main), glucocochlearin, glucotropaeolin, 4-methoxyglucobrassicin                             | Allyl isothiocyanate (from sinigrin)                                                                                                                                                                                                                                    | Thermal and/or enzymatic vs commercial standard (high purity). Glucosinolate hydrolysis products (volatiles) obtained either by thermal (hydrodistillation) or by enzymatic degradation (treatment with myrosinase for 24 h followed by dichloromethane extraction). Comparison with main product pure allyl isothiocyanate (Sigma). | <i>Lepidium latifolium</i> L.; Sigma-Aldrich                                                                                                                                                              | Antimicrobial                                                                                                            | Pathogenic and food spoilage bacteria (standard and clinical strains). Gram-positive bacteria: <i>Listeria monocytogenes</i> , <i>Staphylococcus aureus</i> ; Gram-negative bacteria: <i>Salmonella typhimurium</i> , <i>Escherichia coli</i> , <i>Pseudomonas aeruginosa</i> , <i>Acinetobacter baumannii</i> . Fungus: <i>Candida albicans</i>                          | Blažević et al., 2019 |

|                                                                                                                                       |                                                                                                                                                                                   |                                                                               |                                                                                                                                                                                            |                                                         |                                                                                                                                                                                                                                                                                                                                                                                                                                                                                    |                             |
|---------------------------------------------------------------------------------------------------------------------------------------|-----------------------------------------------------------------------------------------------------------------------------------------------------------------------------------|-------------------------------------------------------------------------------|--------------------------------------------------------------------------------------------------------------------------------------------------------------------------------------------|---------------------------------------------------------|------------------------------------------------------------------------------------------------------------------------------------------------------------------------------------------------------------------------------------------------------------------------------------------------------------------------------------------------------------------------------------------------------------------------------------------------------------------------------------|-----------------------------|
| <b>[Groups I, III &amp; IV]</b>                                                                                                       | Sulforaphane, phenyl-, allyl-, benzyl-, isopropyl isothiocyanate.                                                                                                                 | Not specified (start antimicrobial assay with 0.25 to 32 mM, high purity)     | All plant derived except for isopropyl isothiocyanate. Isothiocyanates inhibit bacterial growth without production of Stx toxin and inhibit the stx-harboring prophages' lytic development | Antibacterial                                           | Enterohemorrhagic <i>Escherichia coli</i> (Shiga toxin-producing <i>E. coli</i> strains)                                                                                                                                                                                                                                                                                                                                                                                           | Nowicki et al., 2014 & 2016 |
| <b>[Group II]</b>                                                                                                                     | Aliphatic isothiocyanates and derivatives                                                                                                                                         | Commercial and/or synthetic sources (high purity)                             | Sigma; synthetic isothiocyanate compounds                                                                                                                                                  | Antimicrobial                                           | <i>Mycobacterium tuberculosis</i>                                                                                                                                                                                                                                                                                                                                                                                                                                                  | Kurepina et al., 2013       |
| <b>[Groups II &amp; IV]</b>                                                                                                           | Benzyl- followed by 2-phenylethyl isothiocyanate (aromatic isothiocyanates) greater antimicrobial activity than aliphatic isothiocyanates 3-butenyl and 4-phenenyl isothiocyanate | Commercial and/or synthetic sources (high purity)                             | Purchased from Kasei (Japan)                                                                                                                                                               | Antimicrobial (stronger against Gram-positive bacteria) | Gram-positive bacteria: <i>Bacillus cereus</i> , <i>Bacillus subtilis</i> , <i>Listeria monocytogenes</i> , <i>Staphylococcus aureus</i> ; Gram-negative bacteria: <i>Aeromonas hydrophila</i> , <i>Pseudomonas aeruginosa</i> , <i>Salmonella choleraesuis</i> KCCM, <i>Salmonella enterica</i> , <i>Serratia marcescens</i> , <i>Shigella sonnei</i> , <i>Vibrio parahaemolyticus</i>                                                                                            | Jang et al., 2010           |
| <b>[Group III]</b><br>Arabidopsis extracts fractionated to give glucosinolates; glucoraphanin (or 4-methylsulfinylbutylglucosinolate) | 4-methylsulfinylbutyl isothiocyanate                                                                                                                                              | Thermal degradation                                                           | <i>Arabidopsis</i> plants                                                                                                                                                                  | Antimicrobial                                           | Wide range of bacteria: <i>Erwinia carotovora</i> , <i>Escherichia coli</i> , <i>Pseudomonas syringae</i> , <i>Sarcina lutea</i> , <i>Xanthomonas campestris</i> . Fungi: <i>Alternaria brassicicola</i> , <i>Botrytis cinerea</i> , <i>Fusarium culmorum</i> , <i>Fusarium oxysporum</i> , <i>Nectria hematococca</i> , <i>Neurospora crassa</i> , <i>Penicillium expansum</i> , <i>Plectosphaerella cucumerina</i> , <i>Verticillium dahliae</i> , <i>Peronospora parasitica</i> | Tierens et al., 2001        |
| <b>[Group III]</b><br>Glucoraphanin                                                                                                   | Sulforaphane                                                                                                                                                                      | Enzymatic (exogenous)                                                         | Broccoli sprouts ( <i>Brassica oleracea</i> )                                                                                                                                              | Antibacterial                                           | 3 reference strains and 45 clinical isolates <i>H. pylori</i> ; bacteriostatic [minimal inhibitory concentration (MIC) for 90% of the strains is <4 ug/ml]                                                                                                                                                                                                                                                                                                                         | Fahey et al., 2002          |
| <b>[Groups III &amp; IV]</b>                                                                                                          | Benzyl isothiocyanate, sulforaphane or 4-(methylsulfinyl) butyl isothiocyanate], 2-phenylethyl isothiocyanate were most effective                                                 | Commercial and/or synthetic sources (high purity)                             | Commercial sources or prepared by chemical synthesis                                                                                                                                       | Antibacterial                                           | <i>Aeromonas</i> species isolated from intestinal segments of pigs                                                                                                                                                                                                                                                                                                                                                                                                                 | Aires et al., 2013          |
| <b>[Group III from fractionated mixture]</b>                                                                                          | Extraction after hydrolysis with exogenous myrosinase: from glucoraphanin [4-(methylsulfinyl)]                                                                                    | Enzymatic (exogenous), followed by CH <sub>2</sub> Cl <sub>2</sub> extraction | <i>Cardaria draba</i> L. Desv.                                                                                                                                                             | Antimicrobial                                           | Wide range of activity against Gram-positive and Gram-negative bacteria and fungi: <i>E. coli</i> , <i>K. pneumonia</i> ,                                                                                                                                                                                                                                                                                                                                                          | Radonic et al., 2011        |

|                                                                                                                           |                                                                                                                                                                                                          |                                                                                                                                                                     |                                                                     |                                                                                                                                                                                                                                                                                                             |                                                                                                                                                                                                                                                                                                                                                                                                                                                                                                                          |                                        |
|---------------------------------------------------------------------------------------------------------------------------|----------------------------------------------------------------------------------------------------------------------------------------------------------------------------------------------------------|---------------------------------------------------------------------------------------------------------------------------------------------------------------------|---------------------------------------------------------------------|-------------------------------------------------------------------------------------------------------------------------------------------------------------------------------------------------------------------------------------------------------------------------------------------------------------|--------------------------------------------------------------------------------------------------------------------------------------------------------------------------------------------------------------------------------------------------------------------------------------------------------------------------------------------------------------------------------------------------------------------------------------------------------------------------------------------------------------------------|----------------------------------------|
| Glucoraphanin (4-methylsulfinylbutylglucosinolate), and smaller amounts of glucosinalbin, glucoerysolin [from extract II] | butyl isothiocyanate (69%) and 5-(methylsulfinyl) pentanenitrile (4.5%); from glucosinalbin [2-(4-hydroxyphenyl) acetonitrile] (7%); from glucoerysolin [4-(methylsulfonyl) butyl isothiocyanate] (5.0%) |                                                                                                                                                                     |                                                                     |                                                                                                                                                                                                                                                                                                             | <i>Enterobacter sakazakii</i> , <i>P. aeruginosa</i> , <i>Cronobacter</i> spp., <i>S. aureus</i> , <i>Rhizopus stolonifera</i> , etc.                                                                                                                                                                                                                                                                                                                                                                                    |                                        |
| <b>[Group IV]</b><br>Gluconasturtiin                                                                                      | Phenylpentyl isothiocyanates (from horseradish autolysates and synthesized isothiocyanates)                                                                                                              | Enzymatic (autolysis/endogenous) and synthetic (high purity) [a series of ω-phenylalkyl isothiocyanates synthesized starting from commercially available chemicals] | <i>Armoracia rusticana</i> (horseradish); synthetic isothiocyanates | Antimicrobial; phenylpentyl isothiocyanate and benzyl isothiocyanate showed strong antimicrobial activity. First report on the antimicrobial activities of phenylpropyl isothiocyanate, phenylbutyl isothiocyanate, phenylpentyl isothiocyanate; phenethyl isothiocyanate had strongest antifungal activity | Activity against Gram-positive and Gram-negative bacteria and fungi: <i>Staphylococcus aureus</i> , <i>Bacillus subtilis</i> , <i>B. cereus</i> , <i>Salmonella enterica</i> , <i>Proteus vulgaris</i> , <i>E. coli</i> , <i>C. albicans</i> , <i>Aspergillus brasiliensis</i>                                                                                                                                                                                                                                           | Dekic et al., 2017                     |
| <b>[Group IV]</b>                                                                                                         | Phenyl isothiocyanate                                                                                                                                                                                    | Commercial and/or synthetic sources (high purity)                                                                                                                   | Sigma                                                               | Antibacterial; affected adhesion, motility, and biofilm formation in bacteria; promising disinfectant                                                                                                                                                                                                       | <i>Escherichia coli</i> and <i>Staphylococcus aureus</i>                                                                                                                                                                                                                                                                                                                                                                                                                                                                 | Abreu et al., 2013; Abreu et al., 2014 |
| <b>[Group IV]</b>                                                                                                         | Sulforaphane                                                                                                                                                                                             | Commercial and/or synthetic sources (high purity)                                                                                                                   | Synthesized at University of Minnesota Cancer center                | Pathogenic bacteria (role as phytochemicals)                                                                                                                                                                                                                                                                | Activity against broad spectrum of bacteria and fungi (23 out of 28 microbial species tested). <i>E. coli</i> , <i>Klebsiella pneumoniae</i> , <i>Salmonella typhimurium</i> , <i>Shigella sonnei</i> , <i>Enterobacter cloacae</i> , <i>Proteus vulgaris</i> , <i>Pseudomonas aeruginosa</i> , <i>Neisseria sicca</i> , <i>Pasteurella multocida</i> , <i>Staph. sp.</i> , <i>Streptococcus pyogenes</i> , <i>Enterococcus faecalis</i> , <i>Bacillus</i> sp. Fungi: <i>Candida albicans</i> , <i>Crypt. neoformans</i> | Johansson et al., 2008                 |
| <b>[Group IV]</b><br>Glucosinolates from horseradish ( <i>A. lapathifolia</i> Gilib.)                                     | Phenethyl isothiocyanate (identified and isolated)                                                                                                                                                       | Enzymatic (endogenous)                                                                                                                                              | <i>Armoracia lapathifolia</i> Gilib. (horseradish) roots            | Antimicrobial                                                                                                                                                                                                                                                                                               | Bacteria: <i>Xanthomonas axonopodis</i> pv. Citri. Fungi: <i>Cytospora</i> spp., <i>Phytophthora capsici</i> , <i>Gibberella zeae</i>                                                                                                                                                                                                                                                                                                                                                                                    | Chen et al., 2012                      |
| <b>[Group IV]</b><br>Glucomoringin [4-(α-L-rhamnosyloxy) benzyl glucosinolate]                                            | Moringin [(4-(α-L-rhamnosyloxy)-benzyl isothiocyanate)]                                                                                                                                                  | Enzymatic (exogenous)                                                                                                                                               | <i>Moringa oleifera</i> Lam.                                        | Antimicrobial                                                                                                                                                                                                                                                                                               | <i>Staphylococcus aureus</i> , <i>Enterococcus casseliflavus</i>                                                                                                                                                                                                                                                                                                                                                                                                                                                         | Galuppo et al., 2013.                  |

|                                                                                                                 |                                                                                                                                                                                             |                                                                                                                                                                                                                            |                                                                                                                                                   |                                                                                                                                                                                                                                                                                                    |                                                                                                                                                                                                                                                    |                                                       |
|-----------------------------------------------------------------------------------------------------------------|---------------------------------------------------------------------------------------------------------------------------------------------------------------------------------------------|----------------------------------------------------------------------------------------------------------------------------------------------------------------------------------------------------------------------------|---------------------------------------------------------------------------------------------------------------------------------------------------|----------------------------------------------------------------------------------------------------------------------------------------------------------------------------------------------------------------------------------------------------------------------------------------------------|----------------------------------------------------------------------------------------------------------------------------------------------------------------------------------------------------------------------------------------------------|-------------------------------------------------------|
| <p><b>[Group IV]</b><br/><i>Sinapis alba</i> L. glucosinolate</p>                                               | <p>Phenethyl isothiocyanate</p>                                                                                                                                                             | <p>White mustard seeds ground to a fine powder/ Purchased (high purity)<br/>Enzymatic (endogenous) + subjected to supercritical fluid extraction to obtain essential oil (thermal degradation)</p>                         | <p><i>Sinapis alba</i> L. (white mustard) seed-derived phenethyl isothiocyanate; other isothiocyanates tested purchased from Fluka or Aldrich</p> | <p>Antibacterial; aromatic isothiocyanates (with phenethyl-, benzyl-, and benzoyl- groups) showed stronger activity than aliphatic isothiocyanates (with acetyl-, allyl-, butyl-, ethyl-, and methyl groups)</p>                                                                                   | <p>Antibacterial activity only against some pathogenic intestinal bacteria (<i>Clostridium difficile</i>, <i>E. coli</i>)</p>                                                                                                                      | <p>Kim and Lee, 2009</p>                              |
| <p><b>[Group IV from fractionated mixture]</b><br/>Sinalbin or 4-hydroxybenzyl glucosinolate</p>                | <p>4-hydroxybenzyl isothiocyanate</p>                                                                                                                                                       | <p>Enzymatic (endogenous) - essential oil</p>                                                                                                                                                                              | <p><i>Sinapis alba</i> L. (white mustard) seed</p>                                                                                                | <p>Antibacterial added to sauce with <i>Salmonella</i> inoculated particulates</p>                                                                                                                                                                                                                 | <p><i>Salmonella</i> sp.</p>                                                                                                                                                                                                                       | <p>David et al., 2013</p>                             |
| <p><b>[Group IV from fractionated mixture]</b></p>                                                              | <p>Benzyl isothiocyanate, chloroform fraction of alcohol extraction and essential oil fraction of <i>Tropaeolum pentaphyllum</i> Lam. Tubers (mainly composed of benzyl isothiocyanate)</p> | <p>Enzymatic (endogenous)/ extraction and fractionation [tubers air dried and extracted with 70% ethanol solution followed by different solvents; essential oil was also studied</p>                                       | <p><i>Tropaeolum pentaphyllum</i> Lam. Tubers (Tropaeolaceae)</p>                                                                                 | <p>Essential oils and the chloroform fraction (of the 70% hydroalcoholic extract) showed strongest antimicrobial activity<br/>Benzyl isothiocyanate identified by GC-MC<br/>Standard tested exhibited strong antifungal activity<br/><br/>Chloroform fraction has additional active components</p> | <p>Different strains of Gram-positive and negative bacteria, <i>Candida</i> spp., and dermatophytes. Strongest activity against <i>E. coli</i> and <i>S. pullorum</i>, fungi (except some filamentous fungi), and fluconazole-resistant yeasts</p> | <p>da Cruz et al., 2016</p>                           |
| <p><b>[Group IV from fractionated mixture]</b><br/>Glucosinolates from <i>Hippocratea welwitschii</i> roots</p> | <p>Aromatic isothiocyanates (benzyl isothiocyanate and 4-methoxybenzyl isothiocyanate)</p>                                                                                                  | <p>Thermal degradation; essential oil was extracted using steam distillation; testing oil mix, dilutions and testing isolated compounds</p>                                                                                | <p>Essential oil of <i>Hippocratea welwitschii</i> roots</p>                                                                                      | <p>Antibacterial</p>                                                                                                                                                                                                                                                                               | <p>Pathogenic bacteria: <i>Staphylococcus aureus</i>, <i>Streptococcus pyogenes</i>, <i>Klebsiella pneumoniae</i>, <i>Bacillus subtilis</i>, <i>Escherichia coli</i>, <i>Shigella dysenteriae</i>, and <i>Pseudomonas aeruginosa</i></p>           | <p>Iwu et al., 1991</p>                               |
| <p><b>[Group IV from fractionated mixture]</b></p>                                                              | <p>Benzyl isothiocyanates</p>                                                                                                                                                               | <p>Thermal degradation; fractionation and testing of separate fractions and combination to verify if antibacterial effect is due to benzyl isothiocyanate; comparing with activity of commercial benzyl isothiocyanate</p> | <p><i>Salvadora persica</i> (Miswak sticks) root extracts; commercial benzyl isothiocyanate (Lancaster Synthesis Inc.)</p>                        | <p>Antibacterial</p>                                                                                                                                                                                                                                                                               | <p>Gram-negative periodontal pathogens: <i>Aggregatibacter actinomycetemcomitans</i>, <i>Porphyromonas gingivalis</i>; bactericidal effect; mechanism of action suggested is by causing protrusions in bacterial membranes</p>                     | <p>Sofrata et al., 2011</p>                           |
| <p><b>[Group IV vs mixture and novel isothiocyanates synthetic derivatives]</b></p>                             | <p>Benzyl isothiocyanate, <math>\beta</math>-phenylethyl isothiocyanate, and other isothiocyanates</p>                                                                                      | <p>Commercial and/or synthetic source (high purity). 11 natural isothiocyanates (obtained from the Royal Veterinary and Agricultura College in</p>                                                                         | <p>11 natural isothiocyanates and 27 synthetic analogues; 57 substituted derivatives of phenylisothiocyanate</p>                                  | <p>Antifungal; negative effect of ionized groups on the aromatic moiety</p>                                                                                                                                                                                                                        | <p><i>Aspergillus niger</i>, <i>Penicillium cyclopium</i>, and <i>Rhizopus oryzae</i></p>                                                                                                                                                          | <p>Drobnica et al., 1967a; Drobnica et al., 1967b</p> |

|                                                                                                                                                                                                                              |                                                                                                                                                                                             |                                                                                                                                                                                                                                                     |                                                                                                                                                                                                     |                                                                                                                                                                                                                          |                                                                                                                                                                                                                                                                                                                                                                                                                                                                                |                       |
|------------------------------------------------------------------------------------------------------------------------------------------------------------------------------------------------------------------------------|---------------------------------------------------------------------------------------------------------------------------------------------------------------------------------------------|-----------------------------------------------------------------------------------------------------------------------------------------------------------------------------------------------------------------------------------------------------|-----------------------------------------------------------------------------------------------------------------------------------------------------------------------------------------------------|--------------------------------------------------------------------------------------------------------------------------------------------------------------------------------------------------------------------------|--------------------------------------------------------------------------------------------------------------------------------------------------------------------------------------------------------------------------------------------------------------------------------------------------------------------------------------------------------------------------------------------------------------------------------------------------------------------------------|-----------------------|
|                                                                                                                                                                                                                              |                                                                                                                                                                                             | Copenhagen/ details not specified/purified)/ synthesized new compounds                                                                                                                                                                              |                                                                                                                                                                                                     |                                                                                                                                                                                                                          |                                                                                                                                                                                                                                                                                                                                                                                                                                                                                |                       |
| <b>[Group V]</b>                                                                                                                                                                                                             | Indole-3-carbinol                                                                                                                                                                           | Commercial and/or synthetic sources (high purity)                                                                                                                                                                                                   | Sigma Chemical Co., St. Louis, U.S.A.                                                                                                                                                               | Antifungal/antibacterial                                                                                                                                                                                                 | <i>Staphylococcus aureus</i> , <i>Staphylococcus epidermidis</i> , <i>Escherichia coli</i> , <i>Saccharomyces cerevisiae</i> , <i>Trichosporon beigelii</i> , <i>Enterococcus faecium</i> , <i>Escherichia coli</i> O157, <i>Pseudomonas aeruginosa</i> , methicillin-resistant <i>Staphylococcus aureus</i> , vancomycin-sensitive <i>Enterococci</i> , multi-resistant <i>Escherichia coli</i> , multi-resistant <i>Pseudomonas aeruginosa</i> , and <i>Candida albicans</i> | Sung and Lee, 2007    |
| <b>[Mixed fractions of glucosinolates and/or hydrolysis products]</b><br>Sinigrin (2-propenyl glucosinolate); allyl glucosinolate) in <i>Sinapis nigra</i> ; sinalbin (4-hydroxybenzyl glucosinolate) in <i>Sinapis alba</i> | Not determined                                                                                                                                                                              | Enzymatic (endogenous). Different solvents and methods tested                                                                                                                                                                                       | <i>Sinapis nigra</i> L. (black mustard), <i>Sinapis alba</i> L. (white or yellow mustard); ultrasound-assisted extraction of ground seeds with ethanol:water (8:2) gave highest glucosinolate yield | Antimicrobial                                                                                                                                                                                                            | Gram positive: <i>Staphylococcus aureus</i> , <i>Streptococcus pyogenes</i> , <i>Bacillus cereus</i> ; Gram negative: <i>Escherichia coli</i> , <i>Pseudomonas aeruginosa</i> . Fungus: <i>Candida albicans</i>                                                                                                                                                                                                                                                                | Boscaro et al., 2018  |
| <b>[Mixed fractions of glucosinolates and/or hydrolysis products]</b><br>Glucobroteroin                                                                                                                                      | 6-(methylsulfanyl) hexanenitrile, hex-5-enenitrile, pent-4-enyl isothiocyanate, and Maillard reaction products (3,4,5-trimethyl pyrazole) may all contribute to activity                    | Thermal degradation/hydrodistillation-volatiles fractionated into water-soluble, water-insoluble, and high volatile fractions                                                                                                                       | <i>Degenia velebitica</i> (endangered species)                                                                                                                                                      | Antimicrobial; the fraction of water-soluble compounds had the strongest antimicrobial activity and the largest mass ratio among volatiles tested                                                                        | <i>Bacillus subtilis</i> , <i>Staphylococcus aureus</i> , <i>Escherichia coli</i> , <i>Pseudomonas aeruginosa</i> , and <i>Candida albicans</i>                                                                                                                                                                                                                                                                                                                                | Mastelic et al., 2010 |
| <b>[Mixture of glucosinolates and/or hydrolysis products]</b>                                                                                                                                                                | Nitriles, isothiocyanates, thiocyanates                                                                                                                                                     |                                                                                                                                                                                                                                                     |                                                                                                                                                                                                     | Antimicrobial                                                                                                                                                                                                            | Activity against broad spectrum of bacteria and fungi                                                                                                                                                                                                                                                                                                                                                                                                                          | Saladino et al., 2017 |
| <b>[Mixture of glucosinolates and/or hydrolysis products]</b><br>Gluconapin, glucoalyssin (5-methylsulfinylpentyl glucosinolate), glucobrassicinapin (4-pentenyl glucosinolate); other glucosinolates identified in lower    | The main isothiocyanates: 3-butenyl isothiocyanate (from gluconapin), 4-pentenyl isothiocyanate (from glucobrassicinapin), and 5-(methylsulfinyl) pentyl isothiocyanate (from glucoalyssin) | Autolysis (endogenous myrosinase) followed by hydrodistillation/heating for one batch; (heat-inactivation of endogenous enzyme) treating with exogenous myrosinase enzyme followed by CH <sub>2</sub> Cl <sub>2</sub> extraction for another batch) | <i>Aurinia leucadea</i> (Guss.) C. Koch                                                                                                                                                             | Antimicrobial; autolysis + thermal degradation and exogenous myrosinase digestion of glucosinolates gave similar products and antimicrobial activity (although some variation, major degradation products were the same) | Wide range of food spoilage and human pathogenic microbial strains: <i>Bacillus cereus</i> , <i>C. albicans</i> , <i>Penicillium spp.</i> , <i>R. stolonifera</i> , <i>P. aeruginosa</i>                                                                                                                                                                                                                                                                                       | Blažević et al., 2011 |



|                                                                                                                                                                                                                                                                                                                                                                                 |                                                                                                                                                                                                                                                                                          |                                                                                                                            |                                                                                                   |                                                                                                |                                                                                                                                                                                                                                                                                                                                                                                                                                               |                         |
|---------------------------------------------------------------------------------------------------------------------------------------------------------------------------------------------------------------------------------------------------------------------------------------------------------------------------------------------------------------------------------|------------------------------------------------------------------------------------------------------------------------------------------------------------------------------------------------------------------------------------------------------------------------------------------|----------------------------------------------------------------------------------------------------------------------------|---------------------------------------------------------------------------------------------------|------------------------------------------------------------------------------------------------|-----------------------------------------------------------------------------------------------------------------------------------------------------------------------------------------------------------------------------------------------------------------------------------------------------------------------------------------------------------------------------------------------------------------------------------------------|-------------------------|
| amounts: glucoraphanin, glucocochlearin, glucotropaeolin, glucoerucin, glucoberteroin                                                                                                                                                                                                                                                                                           |                                                                                                                                                                                                                                                                                          |                                                                                                                            |                                                                                                   |                                                                                                |                                                                                                                                                                                                                                                                                                                                                                                                                                               |                         |
| <b>[Mixture of glucosinolates and/or hydrolysis products]</b>                                                                                                                                                                                                                                                                                                                   | Mixture of isothiocyanates (allyl-, benzyl-, phenylethyl- isothiocyanates) similar to the ones found in herbal preparation from nasturtium ( <i>Tropaeoli majoris herba</i> ) and horseradish ( <i>Armoracia rusticanae radix</i> ) licensed native preparation; commercial compounds    | Commercial and/or synthetic sources (high purity)                                                                          | Angocin® Anti-Infekt, Fluka/Sigma-Aldrich                                                         | Antibacterial                                                                                  | Clinical important pathogens. Bacteria: <i>Haemophilus influenzae</i> , <i>Moraxella catarrhalis</i> , <i>Serratia marcescens</i> , <i>Proteus vulgaris</i> , <i>S. aureus</i> , <i>S. pyogenes</i> , <i>Streptococcus pneumoniae</i> , <i>Klebsiella pneumoniae</i> , <i>E. coli</i> , <i>P. aeruginosa</i> . Fungus: <i>Candida</i> spp.                                                                                                    | Conrad et al., 2013     |
| <b>[Mixture of glucosinolates and/or hydrolysis products]</b>                                                                                                                                                                                                                                                                                                                   | Sulfur compounds (found in cabbage): allyl isothiocyanate, dimethyl trisulfide, methyl methanethiosulfinate, methyl methanethiosulfonate; sinigrin, S-methyl-L-cysteine sulfoxide, dimethyl disulfide did not show much antimicrobial activity; dimethyl sulfide showed limited activity | Commercial and/or synthetic sources (high purity)                                                                          | Purchased from Sigma Chemical Company (St. Louis, MO) or Aldrich Chemical Company (Milwaukee, WI) | Antifungal/antibacterial                                                                       | 15 species of bacteria and 4 species of yeasts. Bacteria: <i>Pediococcus pentosaceus</i> , <i>Lactobacillus brevis</i> , <i>Listeria monocytogenes</i> , <i>Staphylococcus aureus</i> , <i>Escherichia coli</i> , <i>Enterobacter aerogenes</i> , <i>Bacillus subtilis</i> , <i>Salmonella typhimurium</i> . Yeasts: <i>Saccharomyces cerevisiae</i> , <i>Torulopsis etchellsii</i> , <i>Hansenula mrakii</i> , <i>Pichia membranefaciens</i> | Kyung and Fleming, 1997 |
| <b>[Mixture of glucosinolates and/or hydrolysis products]</b><br>17 glucosinolates (2-propenyl, 3-methylsulphinylpropyl, 4-methylsulphinylbutyl, 2-hydroxy-3-butenyl, 3-butenyl, 4-pentenyl, 4-methylthiobutyl, 4-hydroxybenzyl, 2-phenylethyl, indole-3-ylmethyl), glucosinolate hydrolysis products and methanolic extracts from glucosinolate-enriched <i>Brassica</i> crops | Glucosinolate hydrolysis products: allyl-, benzyl-, 3-butenyl-, 4-pentenyl-, phenethyl isothiocyanates, sulforafane, indole-3-carbinol                                                                                                                                                   | Commercial and/or synthetic sources (high purity); methanolic extracts from <i>Brassica</i> crops to obtain glucosinolates | Phytoflan Diehm and Neuberger GmbH, Sigma Aldrich, TCI Europe N. V.                               | Antimicrobial Activity                                                                         | Tested against soil pathogens. Bacteria: <i>Xanthomonas campestris</i> pv. <i>Campestris</i> , <i>Pseudomonas syringae</i> pv. <i>Maculicola</i> . Fungi: <i>Alternaria brassicae</i> , <i>Sclerotinia sclerotiorum</i>                                                                                                                                                                                                                       | Sotelo et al., 2015     |
| <b>[Mixture of glucosinolates and/or hydrolysis products]</b>                                                                                                                                                                                                                                                                                                                   | Allyl isothiocyanates (endogenous myrosinase activity on <i>Brassica juncea</i> seeds)                                                                                                                                                                                                   | Enzymatic (endogenous)                                                                                                     | <i>Brassica juncea</i> (Brown Mustard)                                                            | Antimicrobial activity; allyl isothiocyanate showed potential as a vapor for food preservation | Different bacteria such as <i>Bacillus</i> spp., <i>Staphylococcus</i> spp., <i>Salmonella</i> spp., <i>E. coli</i> , <i>Vibrio parahaemolyticus</i> , and                                                                                                                                                                                                                                                                                    | Isshiki et al., 1992    |

|                                                                                                                                                                                                                                                                                                                                                                                                                                                                                                                                                                                                                                                                                                                                                                                                                                                                                |                                                                                                   |                       |                                      |                                                                                                                                                           |                                                                                                                                                                                        |                          |
|--------------------------------------------------------------------------------------------------------------------------------------------------------------------------------------------------------------------------------------------------------------------------------------------------------------------------------------------------------------------------------------------------------------------------------------------------------------------------------------------------------------------------------------------------------------------------------------------------------------------------------------------------------------------------------------------------------------------------------------------------------------------------------------------------------------------------------------------------------------------------------|---------------------------------------------------------------------------------------------------|-----------------------|--------------------------------------|-----------------------------------------------------------------------------------------------------------------------------------------------------------|----------------------------------------------------------------------------------------------------------------------------------------------------------------------------------------|--------------------------|
| Glucosinolates from brown mustard ( <i>Brassica juncea</i> ) seeds                                                                                                                                                                                                                                                                                                                                                                                                                                                                                                                                                                                                                                                                                                                                                                                                             |                                                                                                   |                       |                                      |                                                                                                                                                           | <i>Pseudomonas aeruginosa</i> . In addition to different yeast and molds                                                                                                               |                          |
| <p><b>[Mixture of glucosinolates and/or hydrolysis products]</b></p> <p>Sinigrin (allyl) from <i>Brassica juncea</i> cv. Vitasso seeds; gluconapin (3-butenyl) <i>Brassica rapa</i> cv. Silla; glucotropaeolin (benzyl) <i>Lepidium sativum</i>; sinalbin (p-hydroxybenzyl) <i>Sinapis alba</i> cv. Maxi; epiprogoitrin [(2S)-2-hydroxy-3-butenyl] <i>Crambe abyssinica</i> cv. Belenzian; glucobarbarin (2-hydroxy-2-phenylethyl) <i>Barbarea vulgaris</i>; glucoerucin (4-methylthiobutyl) <i>Eruca sativa</i>; glucocheirolin (3-methylsulfonylpropyl) <i>Cheirantus annuus</i>; glucoraphenin (4-methylsulfinyl-3-butenyl) <i>Raphanus sativus</i> cv. Pegletta; glucoiberin (3-methylsulfinylpropyl) <i>Iberis amara</i>, rapeseed glucosinolate mixture. All the glucosinolates isolated from cruciferous seeds and have a purity range of 75-91% except the latter.</p> | 11 glucosinolates (isolated from some cruciferous seeds) and their myrosinase hydrolysis products | Enzymatic (exogenous) | Isolated from some cruciferous seeds | Hydrolysis products of glucosinolates (glucoiberin, glucoerucin, glucocheirolin, and glucotropaeolin; sinigrin and epiprogoitrin) had fungitoxic activity | Tested against <i>Fusarium culmorum</i> and plant pathogens <i>Rhizoctonia solani</i> , <i>Sclerotinia sclerotiorum</i> , <i>Diaporthe phaseolorum</i> , and <i>Pythium irregulare</i> | Manici et al., 1997      |
| <b>[Mixture of glucosinolates and/or hydrolysis products]</b>                                                                                                                                                                                                                                                                                                                                                                                                                                                                                                                                                                                                                                                                                                                                                                                                                  | Not identified                                                                                    | Enzymatic (exogenous) | <i>Tropaeolum tuberosum</i>          | Antifungal                                                                                                                                                | <i>Phytophthora infestans</i> , <i>Fusarium oxysporum</i> , <i>Rhizoctonia solani</i>                                                                                                  | Martin and Higuera, 2016 |

|                                                                                                                                                                                                                                                                                                                                                                                                                                                                                                                           |                                                                                                                                                                                                  |                                                                                                                                                                                                          |                                                                                                                                                                                                                                       |                   |                                                                             |                                    |
|---------------------------------------------------------------------------------------------------------------------------------------------------------------------------------------------------------------------------------------------------------------------------------------------------------------------------------------------------------------------------------------------------------------------------------------------------------------------------------------------------------------------------|--------------------------------------------------------------------------------------------------------------------------------------------------------------------------------------------------|----------------------------------------------------------------------------------------------------------------------------------------------------------------------------------------------------------|---------------------------------------------------------------------------------------------------------------------------------------------------------------------------------------------------------------------------------------|-------------------|-----------------------------------------------------------------------------|------------------------------------|
| <p>p-methoxybenzyl glucosinolate (main); p-hydroxybenzyl glucosinolate (not confirmed)</p>                                                                                                                                                                                                                                                                                                                                                                                                                                |                                                                                                                                                                                                  |                                                                                                                                                                                                          |                                                                                                                                                                                                                                       |                   |                                                                             |                                    |
| <p><b>[Mixture of glucosinolates and/or hydrolysis products]</b><br/> Different glucosinolates tested from <i>Brassica</i> species: sinigrin from mustard seed (<i>Brassica juncea</i>), gluconapin from turnip rapeseed (<i>B. campestris</i> cv. Sarson), progoitrin from swede seed (<i>B. napu</i> s subsp. napobrassica cv. Laurentian), glucobrassicin from young leaves of Brussels sprouts (<i>B. oleracea</i> var. gemmifera), 1-methoxyglucobrassicin from cabbage seeds (<i>B. oleracea</i> var. capitata)</p> | <p>2-propenyl isothiocyanate (derived from sinigrin) had the most antifungal activity; glucosinolates not identified (sinigrin + myrosinase had best activity)</p>                               | <p>Enzymatic (exogenous)</p>                                                                                                                                                                             | <p>From seeds of Brassica plants: mustard seed (<i>Brassica juncea</i>), turnip rapeseed (<i>B. campestris</i>), swede seed (<i>B. napu</i>), leaves of Brussels sprouts (<i>B. oleracea</i>), cabbage seeds (<i>B. oleracea</i>)</p> | <p>Antifungal</p> | <p><i>Leptosphaeria maculans</i></p>                                        | <p>Mithen et al., 1986</p>         |
| <p><b>[Mixture of glucosinolates and/or hydrolysis products]</b><br/> Glucosinolates from cabbage treated with thioglucosidase (ICN Biomedical Co.) to release isothiocyanates</p>                                                                                                                                                                                                                                                                                                                                        | <p>Allyl-, benzyl-, 2-phenylethyl- and phenyl isothiocyanates</p>                                                                                                                                | <p>Enzymatic (exogenous)</p>                                                                                                                                                                             | <p>Cabbage</p>                                                                                                                                                                                                                        | <p>Antifungal</p> | <p><i>Alternaria alternata</i> (fungus)</p>                                 | <p>Troncoso et al., 2005</p>       |
| <p><b>[Mixture of glucosinolates and/or hydrolysis products]</b><br/> <i>Brassica</i> species: sinigrin (allyl glucosinolate) as the major component (minor quantities of other glucosinolic acid derivatives). <i>S. alba</i>:</p>                                                                                                                                                                                                                                                                                       | <p>Myrosinase hydrolysis products (Chromadex, Sigma) + purchased glucosinolate hydrolysis products were tested; allyl isothiocyanate from <i>Brassica</i> species had the strongest activity</p> | <p>Enzymatic (exogenous). thioglucosidase enzyme from <i>Sinapis alba</i> (white mustard) seed purchased from Sigma-Aldrich added to natural extracts and to commercial glucosinolates (high purity)</p> | <p><i>Seeds of Brassica nigra, B. juncea</i> cv. Scala, <i>B. carinata</i> cv. Eleven, <i>Sinapis alba</i> cv. Ludique</p>                                                                                                            | <p>Antifungal</p> | <p><i>Phytophthora cinnamoni</i> Rands, <i>Pythium spiculum</i> B. Paul</p> | <p>Arroyo Cordero et al., 2019</p> |

|                                                                                                                                                                                                                                                                                                                                                                                                                                                                                                                                                                                      |                                                                                                                                                                                                                                                                                                                                                                                                                                                          |                                                                                                                                                                                                                         |                                                                     |               |                                                                                                                                                                                  |                       |
|--------------------------------------------------------------------------------------------------------------------------------------------------------------------------------------------------------------------------------------------------------------------------------------------------------------------------------------------------------------------------------------------------------------------------------------------------------------------------------------------------------------------------------------------------------------------------------------|----------------------------------------------------------------------------------------------------------------------------------------------------------------------------------------------------------------------------------------------------------------------------------------------------------------------------------------------------------------------------------------------------------------------------------------------------------|-------------------------------------------------------------------------------------------------------------------------------------------------------------------------------------------------------------------------|---------------------------------------------------------------------|---------------|----------------------------------------------------------------------------------------------------------------------------------------------------------------------------------|-----------------------|
| sinalbin (p-hydroxybenzyl glucosinolate or 4-hydroxybenzyl glucosinolate)                                                                                                                                                                                                                                                                                                                                                                                                                                                                                                            |                                                                                                                                                                                                                                                                                                                                                                                                                                                          |                                                                                                                                                                                                                         |                                                                     |               |                                                                                                                                                                                  |                       |
| <p><b>[Mixture of glucosinolates and/or hydrolysis products]</b></p> <p>Glucoiberberin (3-methylthiopropyl glucosinolate) (in seeds and leaves); glucoiberin (3-methylsulfanylpropyl glucosinolate) and glucoerucin (seeds)</p>                                                                                                                                                                                                                                                                                                                                                      | <p>In seeds: glucoiberberin (detected via its hydrolysis products: 3-(methylthio) propyl isothiocyanate (iberberin) and 4-(methylthio) butanenitrile (iberberin nitrile); glucoiberin (its hydrolysis product 3-(methylsulphiny) propyl isothiocyanate (iberin); glucoerucin (its hydrolysis product 4-(methylthio) butyl isothiocyanate (erucin)</p> <p>In leaves: glucoiberberin (detected by its hydrolysis products, nitrile and isothiocyanate)</p> | Enzymatic (exogeneous)                                                                                                                                                                                                  | <i>Lobularia libyca</i> (Viv.) C.F.W. Meissn.                       | Antimicrobial | Strongest activity was against Gram positive: <i>Staphylococcus aureus</i> ; Gram negative: <i>Pseudomonas aeruginosa</i> . Fungus: <i>Candida albicans</i>                      | Al-Gendy et al., 2016 |
| <p><b>[Mixture of glucosinolates and/or hydrolysis products]</b></p> <p>Twelve glucosinolates identified: sinigrin (2-propenyl glucosinolate), gluconapin (3-butenyl glucosinolate), progointrin (2-hydroxybut-3-enyl glucosinolate), glucoerucin (4-methylthiobutyl glucosinolate), glucoiberin (3-methylsulfanylpropyl glucosinolate), glucoraphanin (4-methylsulfanylbutyl glucosinolate), glucotropaeolin (benzyl glucosinolate), glucobrassicin (indol-3-ylmethyl glucosinolate), neo-glucobrassicin (1-methoxyindol-3-ylmethyl glucosinolate), 4-methoxyglucobrassicin (4-</p> | <p>Extracts containing glucosinolates, isothiocyanates (allyl isothiocyanate, butane-1-isothiocyanate, etc.), nitriles, other hydrolysis products, and other active compounds (flavonoids, phenol compounds, phytoalexines) were tested as mixture</p>                                                                                                                                                                                                   | <p>Thermal degradation. Hydrodistillation involves three main physicochemical processes: hydrodiffusion, hydrolysis, and decomposition by heat. Thermal degradation (frozen samples were heated for 15 min at 70°C)</p> | <i>Brassica oleracea</i> L. var. Botrytis L. (Egyptian cauliflower) | Antimicrobial | Activity against broad range of Gram-positive and Gram-negative bacteria and fungi; strongest inhibitory activity against <i>Escherichia coli</i> , <i>Klebsiella pneumoniae</i> | Hifnawy et al., 2013  |

|                                                                                                                   |                                                                                                                                                                                                                                                                                                                                                                                                                                                                                                                                      |                                                                                                                                                                                                                                                                                                                                            |                                                                                                                                                                                                                                                        |               |                                                                                                                                                                                                                                                                                                                                                                                                                                                                                                                                                                                                               |                                                   |
|-------------------------------------------------------------------------------------------------------------------|--------------------------------------------------------------------------------------------------------------------------------------------------------------------------------------------------------------------------------------------------------------------------------------------------------------------------------------------------------------------------------------------------------------------------------------------------------------------------------------------------------------------------------------|--------------------------------------------------------------------------------------------------------------------------------------------------------------------------------------------------------------------------------------------------------------------------------------------------------------------------------------------|--------------------------------------------------------------------------------------------------------------------------------------------------------------------------------------------------------------------------------------------------------|---------------|---------------------------------------------------------------------------------------------------------------------------------------------------------------------------------------------------------------------------------------------------------------------------------------------------------------------------------------------------------------------------------------------------------------------------------------------------------------------------------------------------------------------------------------------------------------------------------------------------------------|---------------------------------------------------|
| methoxyindol-3-ylmethyl glucosinolate), glucoiberberin (3-methylthiopropyl glucosinolate), n-hexyl glucosinolate  |                                                                                                                                                                                                                                                                                                                                                                                                                                                                                                                                      |                                                                                                                                                                                                                                                                                                                                            |                                                                                                                                                                                                                                                        |               |                                                                                                                                                                                                                                                                                                                                                                                                                                                                                                                                                                                                               |                                                   |
| <b>[Mixture of glucosinolates and/or hydrolysis products]</b>                                                     | Sulforaphane or 4-(methylsulfinyl) butyl isothiocyanate (sulforaphane) and 11 other isothiocyanates                                                                                                                                                                                                                                                                                                                                                                                                                                  | Not specified in Haristoy et al., 2003 & 2005; enzymatic (endogenous) in Yanaka et al., 2009                                                                                                                                                                                                                                               | Sulforaphane provided by J.W. Fahey (Haristoy et al., 2003 & 2005); Glucoraphanin-rich 3-d-old broccoli sprouts (homogenized and checked for > 60% conversion of glucoraphanin to sulforaphane by endogenous myrosinase enzyme) (Yanaka et al., 2009). | Antibacterial | 25 strains of <i>Helicobacter pylori</i> ; agar dilution assay + in vivo assays (mice/humans); humans were instructed to consume 70 g/d 3-d-old germinated broccoli sprouts for 8 wk (validated for glucoraphanin content)                                                                                                                                                                                                                                                                                                                                                                                    | Haristoy et al., 2003 & 2005; Yanaka et al., 2009 |
| <b>[Mixture of glucosinolates and/or hydrolysis products]</b><br>Glucosinolates from horseradish                  | Allyl isothiocyanate, phenethyl isothiocyanate and trace amounts of allyl thiocyanate and 1-butane isothiocyanate                                                                                                                                                                                                                                                                                                                                                                                                                    | Thermal degradation. <i>Amoracia lapathifolia</i> root distillates                                                                                                                                                                                                                                                                         | <i>Amoracia lapathifolia</i> Gilib. (horseradish)                                                                                                                                                                                                      | Antimicrobial | <i>Staphylococcus aureus</i> , <i>Escherichia coli</i> O157:H7; <i>Salmonella typhimurium</i> ; <i>Listeria monocytogenes</i> ; <i>Serratia grimesii</i> ; <i>Lactobacillus sake</i> ; <i>Pseudomonas</i> spp. and Enterobacteriaceae                                                                                                                                                                                                                                                                                                                                                                         | Ward et al., 1998; Delaquis et al., 1999          |
| <b>[Mixture of glucosinolates and/or hydrolysis products]</b><br>Glucoalyssin, glucobrassicinapin, glucoberteroin | The most abundant compounds in the hydrodistillates: 6-(methylthio) hexane nitrile and 5-(methylthio) pentyl isothiocyanate (degradation products from glucoberteroin); 5-hexenenitrile and 4-pentenyl isothiocyanate (degradation products from glucobrassicinapin)<br><br>5,6-epithiohexanenitrile (from glucobrassicinapin) was only detected among hydrodistillates of fresh plant material without autolysis.<br><br>The most abundant products due to hydrolysis by exogenous myrosinase: 6-(methylsulfinyl) hexanenitrile and | Thermal degradation. Volatiles obtained from a) dry plants by hydrodistillation (thermal degradation) b) fresh plants by hydrodistillation c) from fresh plants after autolysis (endogenous enzymatic degradation) followed by hydrodistillation or d) fresh plant material – exogenous enzymatic degradation – dichloromethane extraction | <i>Aurinia sinuate</i>                                                                                                                                                                                                                                 | Antimicrobial | Gram-positive bacteria: <i>Staphylococcus aureus</i> , <i>Bacillus cereus</i> , <i>Clostridium perfringens</i> , <i>Enterococcus faecalis</i> , <i>Micrococcus luteus</i> ; Gram-negative (ampicillin-resistant) bacterial strains: <i>Aeromonas hydrophila</i> , <i>Chryseobacterium indologenes</i> , <i>Enterobacter sakazakii</i> , <i>Enterobacter cloacae</i> , <i>Escherichia coli</i> , <i>Klebsiella pneumoniae</i> , <i>Pseudomonas aeruginosa</i> , <i>Pseudomonas luteola</i> , <i>Vibrio vulnificus</i> .<br>Fungi: <i>Candida albicans</i> , <i>Aspergillus niger</i> , <i>Penicillium</i> spp. | Blažević et al., 2010                             |

|                                                                                                                                                                                                                                                                      |                                                                                                                                                                                                                                             |                                                                                                                                                                                                                             |                                                                            |                                                                                                                                                   |                                                                                                                                                                                                                                                            |                                            |
|----------------------------------------------------------------------------------------------------------------------------------------------------------------------------------------------------------------------------------------------------------------------|---------------------------------------------------------------------------------------------------------------------------------------------------------------------------------------------------------------------------------------------|-----------------------------------------------------------------------------------------------------------------------------------------------------------------------------------------------------------------------------|----------------------------------------------------------------------------|---------------------------------------------------------------------------------------------------------------------------------------------------|------------------------------------------------------------------------------------------------------------------------------------------------------------------------------------------------------------------------------------------------------------|--------------------------------------------|
|                                                                                                                                                                                                                                                                      | 5-(methylsulfinyl) pentyl isothiocyanate (allysin) (from glucoallysin)                                                                                                                                                                      |                                                                                                                                                                                                                             |                                                                            |                                                                                                                                                   |                                                                                                                                                                                                                                                            |                                            |
| <b>[Mixture of glucosinolates and/or hydrolysis products]</b><br>Glucosinolates from horseradish root ( <i>A. rusticana</i> )                                                                                                                                        | Allyl isothiocyanate (60%), phenylethyl (36%) and a minor derivative 3-butyl isothiocyanate (1.5%) as mixture tested in vapor and liquid phase                                                                                              | Thermal degradation. Steam distillation                                                                                                                                                                                     | <i>Armoracia rusticana</i> (horseradish) root                              | Antibacterial                                                                                                                                     | <i>Bacillus</i> sp., <i>Staphylococcus</i> sp., <i>Streptococcus</i> sp., and <i>Enterobacter</i> sp. isolated from jeotgal (a Korean salted and fermented seafood)                                                                                        | Kim et al., 2015                           |
| <b>[Mixture of glucosinolates and/or hydrolysis products]</b><br>Glucoerucin [from extract I]                                                                                                                                                                        | Extraction by hydrodistillation without exogenous myrosinase treatment: 28% 4-(methylsulfonyl) butyl isothiocyanates and 14% 5-(methylsulfonyl) pentanenitrile are the main volatiles originating from glucoerucin degradation with S and N | Thermal degradation: hydrodistillation                                                                                                                                                                                      | <i>Cardaria draba</i> L. Desv.                                             | Antimicrobial                                                                                                                                     | Wide range of activity against Gram-positive and Gram-negative bacteria and fungi ( <i>E. coli</i> , <i>K. pneumonia</i> , <i>Enterobacter sakazakii</i> , <i>P. aeruginosa</i> , <i>Cronobacter</i> spp., <i>S. aureus</i> , <i>Rhizopus stolonifer</i> ) | Radonic et al., 2011                       |
| <b>[Mixture of glucosinolates and/or hydrolysis products]</b><br>Glucosinolates from horseradish; in roots: gluconasturtiin (64.9%), sinigrin (33.91%), glucobrassicin (1.19%); in leaves: sinigrin (99.99%) with trace amounts of gluconapin and glucobrassicinapin | Allyl isothiocyanate, 2-phenylethyl isothiocyanate, nitriles (3-phenylpropanenitrile)<br><br>Similar yields in leaves but not in roots after thermal treatments                                                                             | Thermal degradation: microwave hydrodiffusion and gravity (MHG); microwave-assisted distillation (green extraction and distillation techniques); microwave hydrodiffusion and gravity technique gave best activity in roots | <i>Armoracia lapathifolia</i> Gilib. (horseradish) leaves and roots; Sigma | Antibacterial                                                                                                                                     | Multidrug-resistant ESKAPE strains ( <i>Enterococcus faecium</i> , <i>Staphylococcus aureus</i> , <i>Klebsiella pneumoniae</i> , <i>Acinetobacter baumannii</i> , <i>Pseudomonas aeruginosa</i> , and <i>Enterobacter</i> species)                         | Popovic et al., 2020                       |
| <b>Nitrile, amines and other hydrolysis byproducts</b>                                                                                                                                                                                                               |                                                                                                                                                                                                                                             |                                                                                                                                                                                                                             |                                                                            | Glucosinolates, nitriles, and amines tested did not show antibacterial activity. Glucosinolate hydrolysis products showed activity against plants |                                                                                                                                                                                                                                                            | Aires et al., 2009b; Saladino et al., 2017 |

## **REFERENCES :**

- Abreu, A. C., Borges, A., Simões, L. C., Saavedra, M. J., Simões, M. 2013. Antibacterial activity of phenyl isothiocyanate on *Escherichia coli* and *Staphylococcus aureus*. *Med Chem.* 9(5):756-61.
- Abreu, A. C., Borges, A., Mergulhão, F., Manuel Simões. 2014. Use of phenyl isothiocyanate for biofilm prevention and control. *International Biodeterioration & Biodegradation* 86 (A): 34-41.
- Aires, A., Dias, C., Rosa, E., Saavedra, M. 2013. Antimicrobial susceptibility of *Aeromonas* Spp. isolated from pig ileum segments to natural isothiocyanates. *Med. Chem.* 9:861-866.
- Blažević, I., Đulović, A. Maravić, V. Čikeš Čulić, S. Montaut, P. Rollin. 2019. Antimicrobial and cytotoxic activities of *Lepidium latifolium* L. hydrodistillate, extract and its major sulfur volatile allyl isothiocyanate. *Chemistry & Biodiversity* 16(4):1612-1872.
- Boscaro, V., Boffa, L., Binello, A., Amisano, G., Fornasero, S., Cravotto, G., Gallicchio, M. 2018. Antiproliferative, proapoptotic, antioxidant and antimicrobial effects of *Sinapis nigra* L. and *Sinapis alba* L. Extracts. *Molecules* 23, 3004.
- Chacon, P.A., Muthukumarasamy, P., Holley, R.A. 2006. Elimination of *Escherichia coli* O157:H7 from fermented dry sausages at an organoleptically acceptable level of microencapsulated Allyl isothiocyanate. *Appl Environ Microbiol* 72:3096-3102.
- Choi, K.D., Kim, H.Y., Shin, I.S. 2017. Antifungal activity of isothiocyanates extracted from horseradish (*Armoracia rusticana*) root against pathogenic dermal fungi. *Food Sci. Biotechnol.* 26:847-852.
- da Cruz, R.C., Denardi, L.B., Mossmann, N.J., Piana, M., Alves, S.H., De Campos, M.M.A. 2016. Antimicrobial Activity and Chromatographic Analysis of Extracts from *Tropaeolum pentaphyllum* Lam. Tubers. *Molecules* 21, 566.
- David, J.R.D., Ekanayake, A., Singh, I., Farina, B., Meyer, M. 2013. Effect of white mustard essential oil on inoculated *Salmonella* sp. in a sauce with particulates. *J Food Prot* 76:580–587.
- Dekic, M.S., Radulovic, N.S., Stojanovic, N.M., Randjelovic, P.J., Stojanovic-Radic, Z.Z., Najman, S., Stojanovic, S. 2017. Spasmolytic, antimicrobial and cytotoxic activities of 5-phenylpentyl isothiocyanate, a new glucosinolate autolysis product from horseradish (*Armoracia rusticana* P. Gaertn., B. Mey. & Scherb., Brassicaceae). *Food Chem.* 232:329-339.

Galuppo, M., De Nicola, G.R., Iori, R., Dell'Utri, P., Bramanti, P., Mazzon, E. 2013. Antibacterial activity of glucomoringin bioactivated with myrosinase against two important pathogens affecting the health of long-term patients in hospitals. *Molecules* 18:14340-14348.

Iwu, M. M., N. C. Unaeze, C. O. Okunji, D. G. Corley, D. R. Sanson, M. S. Tempesta. 1991. Antibacterial aromatic isothiocyanates from the essential oil of *Hippocratea welwitschii* roots. *Int. J. Pharmacogn.* 29:154-158.

Johansson, N.L., Pavia, C.S., Chiao, J.W. 2008. Growth inhibition of a spectrum of bacterial and fungal pathogens by sulforaphane, an isothiocyanate product found in broccoli and other cruciferous vegetables. *Planta Med* 74:747-750.

Kim, H.Y., Gornsawun, G., Shin, I.S. 2015. Antibacterial activities of isothiocyanates (ITCs) extracted from horseradish (*Armoracia rusticana*) root in liquid and vapor phases against 5 dominant bacteria isolated from low-salt *Jeotgal*, a Korean salted and fermented seafood. *Food Sci Biotechnol* 24:1405-1412.

Kim, M.G. & Lee, H.S. 2009. Growth-inhibiting activities of phenethyl isothiocyanate and its derivatives and against intestinal bacteria. *J. Food. Sci.* 74:467-471.

Kurepina, N., Kreiswirth, B.N., Mustaev, A. 2013. Growth-inhibitory activity of natural and synthetic isothiocyanates against representative human microbial pathogens. *J. Appl. Microbiol.* 115:943-954.

Kurt, S., Güneş, U., Soylu, E.M. 2011. *In vitro* and *in vivo* ungal activity of synthetic pure isothiocyanates against *Sclerotinia sclerotiorum*. *Pest Manag Sci.* 67(7):869-75.

Liu, T.T. & Yang, T.S. 2010. Stability and antimicrobial activity of allyl isothiocyanate during long-term storage in an oil-in-water emulsion. *J. Food Sci.* 75(5):C445–C451.

Mastelic, J., Blažević, I., Kosalec, I. Chemical composition and antimicrobial activity of volatiles from *Degenia velebitica*, a European stenoendemic plant of the Brassicaceae family. 2010. *Chem. Biodivers.* 7:2755-2765.

Nowicki, D., Maciąg-Dorszyńska, M., Kobiela, W., Herman-Antosiewicz, A., Węgrzyn, A., Szalewska-Pałasz, A., Węgrzyn, G. 2014. Phenethyl isothiocyanate inhibits shiga toxin production in enterohemorrhagic *Escherichia coli* by stringent response induction. *Antimicrob Agents Chemother.* 58(4):2304-2315.



- Pang, Y.H., Sheen, S., Zhou, S., Liu, L., Yam, K.L. 2013. Antimicrobial effects of allyl isothiocyanate and modified atmosphere on *Pseudomonas aeruginosa* in fresh catfish fillet under abuse temperatures. *J Food Sci.* 78(4):M555-9.
- Park, C.M., Taormina, P.J., Beuchat, L.R. 2000. Efficacy of allyl isothiocyanate in killing enterohemorrhagic *Escherichia coli* O157:H7 on alfalfa seeds. *Int J Food Microbiol* 56(1):13–20.
- Radonic, A., Blažević, I., Mastelic, J., Zekic, M., Skocibušić, M., Maravic, A. 2011. Phytochemical analysis and antimicrobial activity of *Cardaria draba* (L.) desv. volatiles. *Chem. Biodivers.* 8:1170-1181.
- Rhee, M.S., Lee, S.Y., Dougherty, R.H., Kang, D.H. 2003. Antimicrobial effects of mustard flour and acetic acid against *Escherichia coli* O157:H7, *Listeria monocytogenes*, and *Salmonella enterica* serovar Typhimurium. *Appl Environ Microbiol* 69(5):2959-2963.
- Saavedra, M., Borges, A., Dias, C., Aires, A., Bennett, R., Rosa, E., Simões, M. 2012. Antimicrobial activity of phenolics and glucosinolate hydrolysis products and their synergy with streptomycin against pathogenic bacteria. *Med. Chem.* 6:174-183.
- Shofran, B. G., Purrington, S. T., Breidt, F., Fleming, H. P. 1998. Antimicrobial properties of sinigrin and its hydrolysis products. *J. Food Sci.* 63:621-624.
- Ward, S. M., P. J. Delaquis, R. A. Holley, and G. Mazza. 1998. Inhibition of spoilage and pathogenic bacteria on agar and precooked roast beef by volatile horseradish distillates. *Food Res. Int.* 31:19–26.
